# Supplementary material
Source: PubMed Central journal article supplement (PMC6258067)

**Supplemental Material:**

**Supplemental Table:** Survey respondent demographics.

**Supplemental Figure 1:** Prevalence of perceived major medical error by physician specialty.

**Supplemental Figure 2:** Burnout and prevalence of perceived major medical error, shown for A. Emotional exhaustion and B. Depersonalization.

## Supplemental Table. Survey respondent demographics

|                                           | <b>N (%) or<br/>median (IQR)</b> | <b>Missing<br/>(N)</b> |
|-------------------------------------------|----------------------------------|------------------------|
| Total respondents                         | 6695 (100%)                      |                        |
| Male gender                               | 4355 (67%)                       | 205                    |
| Age (years)                               | 56 (45-63)                       | 209                    |
| Age category                              |                                  | 209                    |
| <35 years                                 | 330 (5.1%)                       |                        |
| 35-44 years                               | 1220 (19%)                       |                        |
| 45-54 years                               | 1407 (22%)                       |                        |
| 55-64 years                               | 2156 (33%)                       |                        |
| ≥ 65 years                                | 1373 (21%)                       |                        |
| Specialty                                 |                                  | 58                     |
| Internal medicine subspecialty            | 765 (12%)                        |                        |
| Psychiatry                                | 550 (8.3%)                       |                        |
| Family medicine                           | 527 (7.9%)                       |                        |
| Internal medicine                         | 448 (6.8%)                       |                        |
| Surgical subspecialty                     | 371 (5.6%)                       |                        |
| General pediatrics                        | 359 (5.4%)                       |                        |
| Emergency medicine                        | 351 (5.3%)                       |                        |
| Pediatric subspecialty                    | 311 (4.7%)                       |                        |
| Obstetrics/Gynecology                     | 287 (4.3%)                       |                        |
| Radiology                                 | 255 (3.8%)                       |                        |
| General surgery                           | 246 (3.7%)                       |                        |
| Neurology                                 | 238 (3.6%)                       |                        |
| Anesthesiology                            | 233 (3.5%)                       |                        |
| Orthopedic surgery                        | 232 (3.5%)                       |                        |
| Ophthalmology                             | 231 (3.5%)                       |                        |
| Physical medicine and rehabilitation      | 170 (2.6%)                       |                        |
| Pathology                                 | 168 (2.5%)                       |                        |
| Dermatology                               | 164 (2.5%)                       |                        |
| Otolaryngology                            | 161 (2.4%)                       |                        |
| Urology                                   | 116 (1.7%)                       |                        |
| Preventive medicine/Occupational medicine | 105 (1.6%)                       |                        |
| Radiation Oncology                        | 62 (0.9%)                        |                        |
| Neurosurgery                              | 56 (0.8%)                        |                        |
| Other                                     | 231 (3.5%)                       |                        |
| Hours worked per week                     | 50 (40-60)                       | 35                     |
| Nights on call per week                   | 1.0 (0.0-3.0)                    | 335                    |

**Supplemental Figure 1. Prevalence of perceived major medical error by physician specialty.**

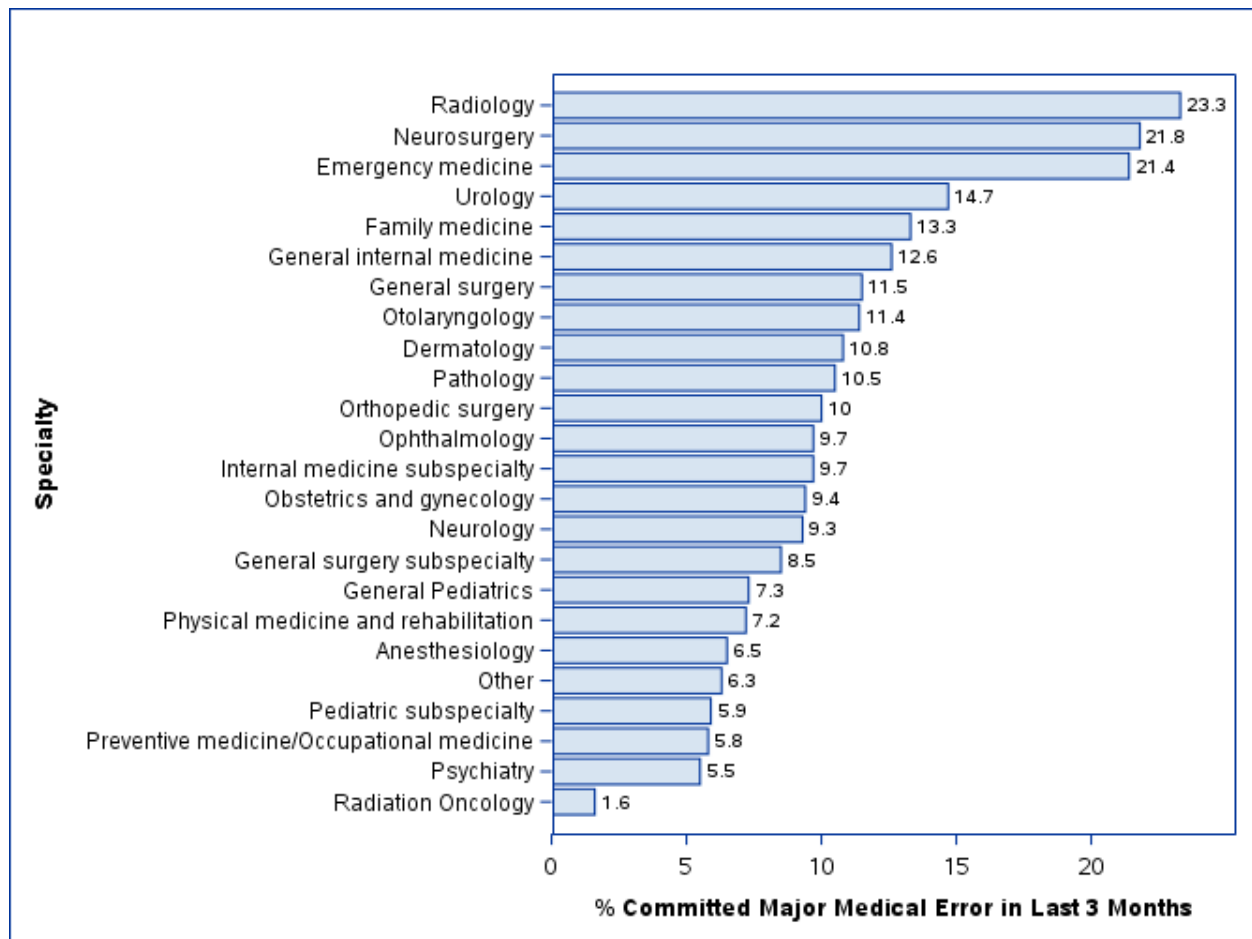

**Supplemental Figure 2. Burnout and prevalence of perceived major medical error, shown for A. Emotional exhaustion and B. Depersonalization.**

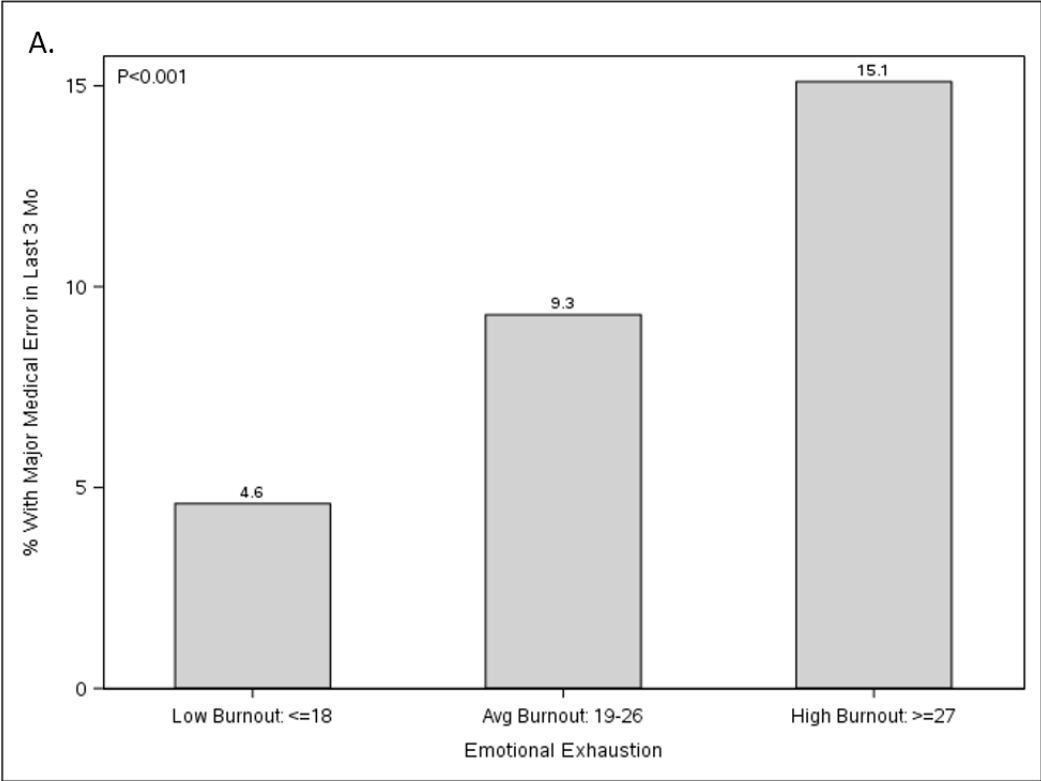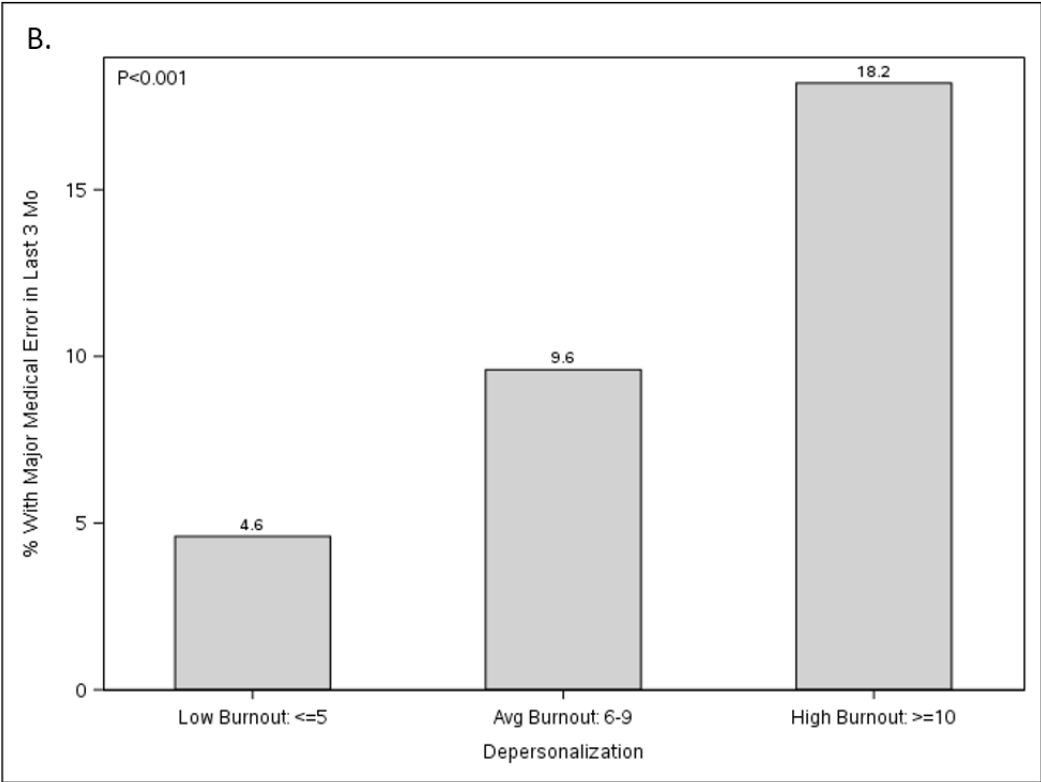

Supplement: NIHMS994987-supplement-Supplemental_Material.pdf [file NIHMS994987-supplement-Supplemental_Material.pdf]
